# Supplementary material
Source: PubMed Central journal article supplement (PMC5560265)
Supplement: NIHMS881572-supplement-1.pdf [file NIHMS881572-supplement-1.pdf]

**Supplementary Table S1: Survival data for mouse experiments**

| Experiment <sup>a</sup> | Rad. Delivery Method and Dose | Xenograft Model         | Survival Variable <sup>b</sup> | Control Survival | Ven. Alone Survival | Rad. Alone Survival | Additive Prediction for Combination Survival <sup>c</sup> | Combination Survival |
|-------------------------|-------------------------------|-------------------------|--------------------------------|------------------|---------------------|---------------------|-----------------------------------------------------------|----------------------|
| 1<br>(Figure 4A)        | Ext. RT<br>8 Gy               | MCL<br>(Rec-1)          | Mn. surv. time (days)          | 12.5             | 17.1                | 18                  | 22.6                                                      | 35.9                 |
|                         |                               |                         | Md. surv. time (days)          | 13               | 13                  | 17                  | 17                                                        | 27                   |
|                         |                               |                         | Cures (%)                      | 0                | 0                   | 0                   | 0                                                         | 11                   |
| 2<br>(Figure 4B)        | Ext. RT<br>10 Gy              | GCB-DLBCL<br>(SU-DHL-6) | Mn. surv. time (days)          | 25.6             | 29.5                | 37.9                | 41.8                                                      | 59.3                 |
|                         |                               |                         | Md. surv. time (days)          | 22               | 29                  | 38.5                | 45                                                        | 48.5                 |
|                         |                               |                         | Cures (%)                      | 0                | 0                   | 0                   | 0                                                         | 10                   |
| 3<br>(Results text)     | Ext. RT<br>6 Gy               | GCB-DLBCL<br>(SU-DHL-6) | Mn. surv. time (days)          | 22               | 26                  | 30                  | 34                                                        | 34                   |
|                         |                               |                         | Md. surv. time (days)          | 22               | 27                  | 27                  | 32                                                        | 33                   |
|                         |                               |                         | Cures (%)                      | 0                | 0                   | 0                   | 0                                                         | 0                    |
| 4<br>(Results text)     | Ext. RT<br>6 Gy               | ABC-DLBCL<br>(U2932)    | Mn. surv. time (days)          | 24               | 52                  | 27                  | 55                                                        | 65                   |
|                         |                               |                         | Md. surv. time (days)          | 22               | 53                  | 27                  | 58                                                        | 61                   |
|                         |                               |                         | Cures (%)                      | 0                | 0                   | 0                   | 0                                                         | 0                    |
| 5<br>(Results text)     | PRIT<br>400μCi                | MCL<br>(Rec-1)          | Mn. surv. time (days)          | 12               | 17                  | 18                  | 22                                                        | 25                   |
|                         |                               |                         | Md. surv. time (days)          | 12               | 15                  | 18                  | 21                                                        | 25                   |
|                         |                               |                         | Cures (%)                      | 0                | 0                   | 0                   | 0                                                         | 0                    |
| 5<br>(Figure 5A)        | PRIT<br>800μCi                | MCL<br>(Rec-1)          | Mn. surv. time (days)          | 12               | 17                  | 26                  | 30                                                        | 71                   |
|                         |                               |                         | Md. surv. time (days)          | 12               | 15                  | 27                  | 30                                                        | 54                   |
|                         |                               |                         | Cures (%)                      | 0                | 0                   | 0                   | 0                                                         | 25                   |
| 6<br>(Figure 5B)        | PRIT<br>800μCi                | ABC-DLBCL<br>(U2932)    | Mn. surv. time (days)          | 22               | 55                  | 74                  | 107                                                       | 120                  |
|                         |                               |                         | Md. surv. time (days)          | 21               | 58                  | 65                  | 102                                                       | 120                  |
|                         |                               |                         | Cures (%)                      | 0                | 0                   | 10                  | 10                                                        | 100                  |
| 6<br>(Figure 5B)        | PRIT<br>1200μCi               | ABC-DLBCL<br>(U2932)    | Mn. surv. time (days)          | 22               | 55                  | 84                  | 117                                                       | 120                  |
|                         |                               |                         | Md. surv. time (days)          | 21               | 58                  | 66                  | 103                                                       | 120                  |
|                         |                               |                         | Cures (%)                      | 0                | 0                   | 30                  | 30                                                        | 100                  |

<sup>a</sup>For all experiments, n = 8-10 mice/group. <sup>b</sup>For mean and median survival calculations, long-term survivors (cures) were assigned survival times of 120 days, so survival times for groups with long-term survivors are conservative minimum estimates. Median survival time was calculated as the middle survival date for the group. Cure defined as survival for >120 days with no sign of relapse. <sup>c</sup>Additive predictions for combination group survival were calculated as: (survival of venetoclax group) + (survival of radiotherapy group) – (survival of control group).
